# Supplementary material for: Patient derived organoids to model rare prostate cancer phenotypes
Source: PubMed Central journal article supplement (PMC6008438; doi:10.1038/s41467-018-04495-z), 2018-06-19
Supplement: 41467_2018_4495_MOESM3_ESM.pdf [file 41467_2018_4495_MOESM3_ESM.pdf]

## Description of Additional Supplementary Files

**File Name:** Supplementary Data 1.

**Description:** GSEA analysis, *related to Figure 3*. Significant GSEA signatures in organoids comparing shEZH2 versus shscramble and GSK503 treatment versus vehicle with corresponding p-values and FDR.
